# Supplementary material
Source: publisher site journal article supplement (https://www.spandidos-publications.com/5536/downloadSupplementary)
Supplement: Supplementary file 1 [file downloadSupplementary]

## Sheet: Quality Summary
Table SII. The quality control result of sequencing data
Sample	IP/Input	Raw Data								Clean Data								Clean Reads%
		R1				R2				R1				R2
		# reads	# bases	Q20	Q30	# reads	# bases	Q20	Q30	# reads	# bases	Q20	Q30	# reads	# bases	Q20	Q30
	LPS_1_Input	44414990	5420025942	97.8%	94.8%	44414990	5419300356	97.7%	94.7%	43404634	5329402173	98.1%	95.2%	43404634	5325970149	98.2%	95.4%	97.7%
	LPS_2_Input	42147173	4711858205	97.8%	95.0%	42147173	4713609237	97.8%	95.0%	40827696	4619118054	98.2%	95.4%	40827696	4617220575	98.3%	95.7%	96.9%
	LPS_3_Input	43842745	5116979152	97.8%	94.9%	43842745	5116908984	97.9%	95.1%	42641588	5024029156	98.1%	95.3%	42641588	5021245261	98.4%	95.8%	97.3%
	Control_1_Input	48365649	5787924785	97.8%	94.8%	48365649	5787075071	97.9%	95.3%	47252199	5693261062	98.1%	95.3%	47252199	5690432891	98.5%	95.9%	97.7%
	Control_2_Input	47880073	5609466163	97.7%	94.8%	47880073	5609482623	98.0%	95.3%	46662162	5511767393	98.1%	95.2%	46662162	5509716751	98.5%	96.0%	97.5%
	Control_3_Input	46154598	5444579530	97.8%	94.9%	46154598	5444200502	98.0%	95.4%	45010902	5351306818	98.1%	95.3%	45010902	5349015054	98.5%	96.0%	97.5%
